# Supplementary material
Source: PubMed Central journal article supplement (PMC6879308)
Supplement: NIHMS1525375-supplement-1.pdf [file NIHMS1525375-supplement-1.pdf]

**SuppTable 1. Lists of genes presented in ZEBra and their differential regulation in the arcopallial domains and subdomains described in Table 1.**

| Whole Arco.<br>(A) |     | Anterior<br>Arco. (AA) |     |                   |     | Dorsal Arco.<br>(AD) |     |         |     | Posterior Arco.<br>(AP) |     | Intermediate<br>Arco. (AI) |     | Ventral<br>Arco (AV) |   |
|--------------------|-----|------------------------|-----|-------------------|-----|----------------------|-----|---------|-----|-------------------------|-----|----------------------------|-----|----------------------|---|
| A                  | +/- | AAc/AArl               | +/- | Medial Arco. (AM) |     | AD                   | +/- | APv     | +/- | AI                      | +/- | AV                         | +/- |                      |   |
|                    |     |                        |     | AMVi              | +/- | AMD                  | +/- |         |     |                         |     |                            |     |                      |   |
| AKR1D1             | -   | GABRB3                 | -   | CACNA1E           | -   | FAM163B              | -   | PLXNC1  | -   | GABRD                   | -   | LGI1                       | -   | AQP1                 | + |
| ARHGDIB            | -   | IL1RAPL2               | -   | CPNE2             | -   | ADRA1D               | +   | TBR1    | -   | LMO3                    | -   | NTS                        | -   | ARHGDIB              | + |
| BAIAP2             | -   | KCNAB2                 | -   | GLRA3             | -   | AQP1                 | +   | ARHGDIB | +   | NTS                     | -   |                            |     | CACNA1E              | + |
| C11ORF87           | -   | CAMK2D                 | +   | KCNA6             | -   | CAMKK1               | +   | ATP2A3  | +   | ADCYAP1                 | -   | <b>Ald</b>                 | +/- | CNTN4                | + |
| CACNA2D1           | -   | CHRNA4                 | +   | KIF26B            | -   | CDH4                 | +   | CACNA1E | +   | ARHGDIB                 | +   | ABCG4                      | -   | KCNA6                | + |
| CACNB4             | -   | CNTN4                  | +   | PLD1              | -   | CHRM4                | +   | CBLN4   | +   | CACNA2D3                | +   | ADRA1D                     | -   | LMO1                 | + |
| CACNG5             | -   | CPNE2                  | +   | PLXNC1            | -   | CRHR1                | +   | CD99L2  | +   | CAMKK1                  | +   | ATP2A3                     | -   | NTS                  | + |
| CAMKK1             | -   | DHCR24                 | +   | PTPRZ1            | -   | NEUROD6              | +   | CRHR1   | +   | HPCAL1                  | +   | CACNA1E                    | -   | SLC6A7               | + |
| CRHR1              | -   | FNDC9                  | +   | ARHGDIB           | +   | NTS                  | +   | DHCR24  | +   | KCTD12                  | +   | CACNB2                     | -   |                      |   |
| DACH1              | -   | GLRA4                  | +   | DAPK1             | +   | SYNGR3               | +   | GABRD   | +   | MAOB                    | +   | CACNG3                     | -   |                      |   |
| DRD7               | -   | GRIK3                  | +   | FAM163B           | +   |                      |     | HPCAL1  | +   | NETO1                   | +   | CDH4                       | -   |                      |   |
| EPHA4              | -   | HTATIP2                | +   | FOSL2             | +   |                      |     | HTR2A   | +   | ORAI2                   | +   | CPNE2                      | -   |                      |   |
| FNBP1              | -   | ID2                    | +   | KCMF1             | +   |                      |     | KCNA6   | +   | PLD1                    | +   | DHCR24                     | -   |                      |   |
| GRM1               | -   | KCNA6                  | +   | KCND2             | +   |                      |     | KCNT1   | +   | SLC6A7                  | +   | FAM163B                    | -   |                      |   |
| HPCAL1             | -   | KCNK12                 | +   | KCTD12            | +   |                      |     | KCTD12  | +   |                         |     | GDA                        | -   |                      |   |
| ID2                | -   | KCNT1                  | +   | MAOA              | +   |                      |     | MAOB    | +   | <b>APd</b>              | +/- | GPM6A                      | -   |                      |   |
| KCNC2              | -   | KCTD16                 | +   | PPM1E             | +   |                      |     | NETO1   | +   | FOSL2                   | -   | GRIN2B                     | -   |                      |   |
| KCNIP1             | -   | KCTD20                 | +   | RGS12             | +   |                      |     | NTS     | +   | ARHGDIB                 | +   | HTR1B                      | -   |                      |   |
| KCNS2              | -   | KIF21A                 | +   | RHOB              | +   |                      |     | PLD1    | +   | CACNA1E                 | +   | JPT1                       | -   |                      |   |
| KCTD16             | -   | LMO1                   | +   | SLC6A6            | +   |                      |     | QSOX1   | +   | CAMKK1                  | +   | KCNA6                      | -   |                      |   |
| LMO1               | -   | NETO1                  | +   | SV2B              | +   |                      |     | RASGRF2 | +   | CDH4                    | +   | KCNF1                      | -   |                      |   |
| NECTIN3            | -   | NTS                    | +   | VIP               | +   |                      |     | SEMA3E  | +   | CRHR1                   | +   | KCTD3                      | -   |                      |   |
| NTS                | -   | RGS12                  | +   |                   |     |                      |     | SLC6A7  | +   | GABRD                   | +   | LGI1                       | -   |                      |   |
| PLPP4              | -   | RHOB                   | +   | <b>AMVI</b>       | +/- |                      |     | CALB2   | +   | HPCAL1                  | +   | NEGR1                      | -   |                      |   |
| RASGRF2            | -   | RTN4R                  | +   | CACNB2            | -   |                      |     | CCK     | +   | MAOB                    | +   | NRXN1                      | -   |                      |   |
| RGS12              | -   | ZEB2                   | +   | CRHR1             | -   |                      |     |         |     | NTS                     | +   | NTS                        | -   |                      |   |
| RTN4RL1            | -   |                        |     | PLXNC1            | -   |                      |     |         |     | ORAI2                   | +   | PAK6                       | -   |                      |   |
| SERTM1             | -   | <b>AArm</b>            | +/- | PTPRZ1            | -   |                      |     |         |     | PLD1                    | +   | PLD1                       | -   |                      |   |

|        |   |             |             |     |      |   |           |     |
|--------|---|-------------|-------------|-----|------|---|-----------|-----|
| SOX4   | - | None        | CAMK2D      | +   | ZEB2 | + | PLXNC1    | -   |
| WWC1   | - |             | FAM163B     | +   |      |   | PRKAR1B   | -   |
| CADPS2 | + | <b>AArl</b> | FNDC9       | +   |      |   | SCN3B     | -   |
| FOSL2  | + | SLC6A7      | ID2         | +   |      |   | SEPT12    | -   |
| GABRB3 | + |             | KCTD12      | +   |      |   | SLC6A7    | -   |
| LMO3   | + | <b>AAv</b>  | MAOA        | +   |      |   | SLIT1     | -   |
| P4HA2  | + | ARHGDIB     | NTS         | +   |      |   | SNCA      | -   |
| SH3BP5 | + | SLC6A7      | RGS12       | +   |      |   | SYNGR3    | -   |
|        |   | CAMK2D      | SLC24A2     | +   |      |   | UNC5A     | -   |
|        |   | FNDC9       |             |     |      |   | WASF1     | -   |
|        |   | ID2         | <b>AMVm</b> | +/- |      |   | ADAM23    | +   |
|        |   | KCNK12      | GABRA5      | +   |      |   | ANXA6     | +   |
|        |   | RGS12       | MAOB        | +   |      |   | ATP2B2    | +   |
|        |   |             | <b>AMVc</b> | +/- |      |   | CABP1     | +   |
|        |   |             | KCMF1       | -   |      |   | CALN1     | +   |
|        |   |             | ID2         | +   |      |   | CAMTA1    | +   |
|        |   |             | KCNA6       | +   |      |   | CD99L2    | +   |
|        |   |             | KIF26B      | +   |      |   | CNTNAP2   | +   |
|        |   |             | MGAT4C      | +   |      |   | KCNC1     | +   |
|        |   |             | PLPP4       | +   |      |   | NEFM      | +   |
|        |   |             | TMEM74      | +   |      |   | PLS3      | +   |
|        |   |             |             |     |      |   | QSOX1     | +   |
|        |   |             |             |     |      |   | RCAN2     | +   |
|        |   |             |             |     |      |   | RGS4      | +   |
|        |   |             |             |     |      |   | SCN1A     | +   |
|        |   |             |             |     |      |   | SCN8A     | +   |
|        |   |             |             |     |      |   | TBR1      | +   |
|        |   |             |             |     |      |   | <b>RA</b> | +/- |
|        |   |             |             |     |      |   | ABCG4     | -   |
|        |   |             |             |     |      |   | ADCYAP1   | -   |
|        |   |             |             |     |      |   | ADRA1D    | -   |
|        |   |             |             |     |      |   | ARHGDIB   | -   |

|          |   |
|----------|---|
| ARPC5    | - |
| ATP2A3   | - |
| B3GNT2   | - |
| BAIAP2   | - |
| BTBD10   | - |
| CACNA1E  | - |
| CACNA1H  | - |
| CACNB2   | - |
| CAMK2A   | - |
| CDH4     | - |
| CDH8     | - |
| CHRM4    | - |
| CHRNA4*  | - |
| CNTN5    | - |
| CPNE2    | - |
| CRHR1    | - |
| CRHR2    | - |
| DHCR24   | - |
| DOK4     | - |
| DPP6     | - |
| FAM163B  | - |
| GABRB3   | - |
| GAP43*   | - |
| GDA      | - |
| GPM6A    | - |
| GRIN2B   | - |
| GRIN3A   | - |
| GRK3     | - |
| IL1RAPL2 | - |
| JPT1     | - |
| KCNA6    | - |
| KCNF1    | - |
| KCNIP1   | - |

|         |   |
|---------|---|
| KCNJ6   | - |
| KCNK12  | - |
| KCNK15  | - |
| KCNS2   | - |
| KCNT2   | - |
| KCTD12  | - |
| KCTD3   | - |
| KIF26B  | - |
| LINGO1  | - |
| MAP4    | - |
| MGAT4C  | - |
| NECAB2  | - |
| NEGR1   | - |
| NRXN1   | - |
| P4HA2   | - |
| PAK6    | - |
| PLD1    | - |
| PLXNA1  | - |
| PLXNC1  | - |
| PRKAR1B | - |
| PTPRN2  | - |
| PTPRU   | - |
| PTPRZ1  | - |
| RELN    | - |
| RIMS4   | - |
| RTN4R   | - |
| SCN2A   | - |
| SEPT12  | - |
| SEPT6   | - |
| SH3BP5  | - |
| SLC6A7  | - |
| SLC8A1  | - |
| SLIT1   | - |

|           |   |
|-----------|---|
| SNCA      | - |
| STK26     | - |
| SYBU      | - |
| SYN3      | - |
| SYNGR3    | - |
| TNFAIP8L3 | - |
| TOB1      | - |
| TRIB2     | - |
| UNC5A     | - |
| VIP       | - |
| WASF1     | - |
| ACKR3     | + |
| ADAM23    | + |
| ANXA6     | + |
| APOH      | + |
| ASS1*     | + |
| ATP2B2    | + |
| CABP1     | + |
| CACNA2D2  | + |
| CAMTA1    | + |
| CD99L2    | + |
| CDH9*     | + |
| CNTNAP2   | + |
| DCN*      | + |
| DENND2A*  | + |
| FLRT2*    | + |
| GLRA4     | + |
| GRM3      | + |
| GSTA4*    | + |
| HTR1B     | + |
| IGF1      | + |
| KCNAB1    | + |
| KCNAB2    | + |

|                       |   |
|-----------------------|---|
| KCNC1                 | + |
| KCTD16                | + |
| KCTD20                | + |
| MPZL1                 | + |
| MT3*                  | + |
| NEFL                  | + |
| NEFM                  | + |
| PLS3                  | + |
| PLXNA4                | + |
| QSOX1                 | + |
| RCAN2                 | + |
| RGS4                  | + |
| RHOB                  | + |
| ROBO1                 | + |
| SAP30L                | + |
| SCN1A                 | + |
| SCN8A                 | + |
| SELENOP2 <sup>†</sup> | + |
| SLC24A2               | + |
| SLC4A4                | + |
| SYNJ1*                | + |
| TMRA*                 | + |
| UCHL1                 | + |
| UGT8                  | + |
| UCHL1                 | + |
| UGT8                  | + |

\* Evaluated in RA, but not AId

| <b>Air</b> | <b>+/-</b> |
|------------|------------|
| ABCG4      | -          |
| CDH8       | -          |
| FAM163B    | -          |
| GAP43      | -          |

|             |            |
|-------------|------------|
| GDA         | -          |
| GPM6A       | -          |
| LGI1        | -          |
| NTS         | -          |
| PRKAR1B     | -          |
| SNCA        | -          |
| UNC5A       | -          |
| ANXA6       | +          |
| ARGHD1B     | +          |
| ATP2A3      | +          |
| CD99L2      | +          |
| KCNS1       | +          |
| <b>Alrv</b> | <b>+/-</b> |
| CPNE2       | -          |
| LGI1        | -          |
| NTS         | -          |
| SNCA        | -          |
| CAMKK1      | +          |
| CXCL14      | +          |
| DCX         | +          |
| DHCR24      | +          |
| LMO1        | +          |
| NETO1       | +          |

**SuppTable 2. Proposed correspondences between zebra finch AM domains described here and nucleus Taenia (Tn/TN/TnA) in the literature**

| <b>Species (analysis)</b>                              | <b>AMD</b>                                     | <b>AMV</b>                              | <b>Comment</b>                                                                                                        | <b>Citation</b>         |
|--------------------------------------------------------|------------------------------------------------|-----------------------------------------|-----------------------------------------------------------------------------------------------------------------------|-------------------------|
| Canary (Cytoarchitectonics)                            | Labeled Tn in plates 23-24 above the OM        | Labeled Tn in plates 35-29 below the OM | Atlas has two structures labeled Tn; one is above and one is below the OM.                                            | Stokes et al., 1974     |
| Zebra finch (CYP19A1 mRNA)                             | Dorsal part of structure labeled Tn in Fig. 5D | Labeled Tn in Fig. 5D                   | In situ data presented schematically. Border drawn medial to RA erroneously excludes dorsal AMD from the arcopallium. | Shen et al., 1995       |
| Zebra finch (CYP19A1 protein)                          | Labeled Tn in Fig. 1F                          | Labeled Tn in Fig. 1G                   | ICC data presented schematically; two structures labeled Tn.                                                          | Balthazart et al., 1996 |
| Zebra finch (CYP19A1 protein)                          | Labeled Tn in Fig. 3                           | Labeled Tn in Fig. 3                    | Expression data shown schematically. Caudal portion of AMD was excluded from arcopallium                              | Saldanha et al., 2000   |
| Zebra finch                                            | Labeled TnA in Fig. 9d (?)                     | Labeled TnA in Fig. 9d                  | Avian Brain Nomenclature Forum recommendation                                                                         | Reiner et al., 2004     |
| Song sparrow (CYP19A1 mRNA)                            | Structure labeled Tn in Fig. 2D                | Not indicated                           | Data consistent with zebra finch                                                                                      | Soma et al., 2003       |
| White-throated sparrow (CYP19A1 mRNA)                  | unpublished                                    | unpublished                             | Data mostly consistent with zebra finch. Higher aromatase expression in AMD than AMV.                                 | Maney; personal comm.   |
| White-throated sparrow (serotonin transporter protein) | not indicated                                  | TnA in Fig. 4C                          |                                                                                                                       | Matragrano et al., 2012 |
| House sparrow (CYP19A1 mRNA)                           | Labeled A in Fig. 3F                           | labeled TN in Fig 3F                    |                                                                                                                       | Metzdorf et al., 1999   |
| Canary (CYP19A1 mRNA)                                  | labeled A in Fig. 3E                           | labeled TN in Fig 3E                    |                                                                                                                       | Metzdorf et al., 1999   |
| Starling (Cytoarchitectonics)                          | Not indicated                                  | Labeled Tn in Fig. 1A                   |                                                                                                                       | Cheng et al., 1999      |
